# Supplementary material
Source: publisher figshare collection journal article supplement (https://wiley.figshare.com/articles/dataset/_/3520571)
Supplement: Supplementary file 1 [file 1]

Sean C. Anderson, Jonathan W. Moore, Michelle M. McClure, Nicholas K. Dulvy, Andrew B. Cooper. 2014. Portfolio conservation of metapopulations under climate change. *Ecological Applications* 25:559–572.

APPENDIX B. Simulation input parameters and default values.

Table B1. Input parameters to the salmon metapopulation simulation with default values.

| Description                                                                                                                       | Symbol              | Value          | Reference                         |
|-----------------------------------------------------------------------------------------------------------------------------------|---------------------|----------------|-----------------------------------|
| <i>Population dynamics parameters</i>                                                                                             |                     |                |                                   |
| Stock-recruit residual standard deviation (on log scale)                                                                          | $\sigma_r$          | 0.7            | Thorson et al. 2014               |
| AR(1) serial correlation of stock-recruit residuals                                                                               | $\rho_w$            | 0.4            | Thorson et al. 2014               |
| Fraction of fish that stray from natal streams                                                                                    | $f_{\text{stray}}$  | 0.02           | Quinn 2005 and references therein |
| Exponential rate of decay of straying with distance                                                                               | $m$                 | 0.1            | Cooper and Mangel 1999            |
| Range of maximum productivities                                                                                                   | $a_i^{\text{max}}$  | 2.2–2.9        | Dorner et al. 2008                |
| <i>Environmental parameters</i>                                                                                                   |                     |                |                                   |
| Width parameter for thermal-tolerance curves for populations $i$ 1 to $n$ (values generate widths in line with listed references) | $W_i$               | 0.08–0.04–0.08 | Brett 1952; Eliason et al. 2011   |
| Optimum environmental value for populations $i$ 1 to $n$                                                                          | $e_i^{\text{opt}}$  | 13–19          | Eliason et al. 2011               |
| Standard deviation of annual temperature fluctuations                                                                             | $\sigma_d$          | 2              | Eliason et al. 2011               |
| AR(1) autocorrelation of annual temperature fluctuations                                                                          | $\rho_e$            | 0.1            |                                   |
| Annual increase in stream temperature in degrees Celcius                                                                          | $\beta_e$           | 0.04           | Mantua et al. 2010                |
| <i>Fishery parameters</i>                                                                                                         |                     |                |                                   |
| Standard deviation of beta distribution for implementation error                                                                  | $\sigma_h$          | 0.1            | Pestes et al. 2008                |
| Frequency of assessment (years)                                                                                                   | $f_{\text{assess}}$ | 5              |                                   |

## Literature cited

- Brett, J. R. 1952. Temperature Tolerance in Young Pacific Salmon, Genus *Oncorhynchus*. J. Fish. Res. Bd. Can. 9:265–323.
- Cooper, A. B., and M. Mangel. 1999. The dangers of ignoring metapopulation structure for the conservation of salmonids. Fish. Bull. 97:213–226.
- Dorner, B., R. M. Peterman, and S. L. Haeseker. 2008. Historical trends in productivity of 120 Pacific pink, chum, and sockeye salmon stocks reconstructed by using a Kalman filter. Can. J. Fish. Aquat. Sci. 65:1842–1866.
- Eliason, E. J., T. D. Clark, M. J. Hague, L. M. Hanson, Z. S. Gallagher, K. M. Jeffries, M. K. Gale, D. A. Patterson, S. G. Hinch, and A. P. Farrell. 2011. Differences in thermal tolerance among sockeye salmon populations. Science 332:109–112.
- Mantua, N., I. Tohver, and A. Hamlet. 2010. Climate change impacts on streamflow extremes and summertime stream temperature and their possible consequences for freshwater salmon habitat in Washington State. Climatic Change 102:187–223.
- Pestes, L. R., R. M. Peterman, M. J. Bradford, and C. C. Wood. 2008. Bayesian decision analysis for evaluating management options to promote recovery of a depleted salmon population. Conserv. Biol. 22:351–361.
- Quinn, T. P. 2005. The Behaviour and Ecology of Pacific Salmon and Trout. American Fisheries Society, Bethesda, Maryland.
- Thorson, J. T., O. P. Jensen, and E. F. Zipkin. 2014. How variable is recruitment for exploited marine fishes? A hierarchical model for testing life history theory. Can. J. Fish. Aquat. Sci. 71:973–983.
